# Supplementary material for: Avian Influenza Virus Status and Maternal Antibodies in Nestling White Ibis (Eudocimus albus)
Source: MDPI journal article supplement (doi:10.3390/microorganisms9122468), 2021-11-30
Supplement: s1 [file s1]

| Collection information |         |                             |            | Serological Screening |                  | Viruc          |
|------------------------|---------|-----------------------------|------------|-----------------------|------------------|----------------|
| Year                   | Habitat | Ibis Field ID <sup>++</sup> | Age (days) | Plasma Sample ID      | S/N <sup>*</sup> | Swab Sample ID |
| 2020                   | Urban   | 1                           | 2          | 70                    | 0.078            | IBIS20-047     |
| 2020                   | Urban   | 1                           | 9          | 69                    | 0.325            | IBIS20-052     |
| 2020                   | Urban   | 1                           | 15         | 65                    | 0.529            | IBIS20-062     |
| 2020                   | Urban   | 1                           | 23         | 44                    | 0.731            | IBIS20-072     |
| 2020                   | Urban   | 2                           | 1          | 46                    | 0.059            | IBIS20-049     |
| 2020                   | Urban   | 2                           | 8          | 45                    | 0.221            | IBIS20-058     |
| 2020                   | Urban   | 2                           | 15         | 5                     | 0.214            | IBIS20-068     |
| 2020                   | Urban   | 3                           | 1          | NS <sup>A</sup>       | NA <sup>B</sup>  | IBIS20-061     |
| 2020                   | Urban   | 3                           | 8          | 90                    | 0.327            | IBIS20-056     |
| 2020                   | Urban   | 4                           | 1          | 91                    | 0.217            | IBIS20-048     |
| 2020                   | Urban   | 5                           | 2          | 71                    | 0.118            | IBIS20-050     |
| 2020                   | Urban   | 5                           | 8          | 68                    | 0.356            | IBIS20-059     |
| 2020                   | Urban   | 5                           | 15         | 58                    | 0.502            | IBIS20-069     |
| 2020                   | Urban   | 6                           | 2          | 59                    | 0.062            | IBIS20-051     |
| 2020                   | Urban   | 6                           | 10         | 61                    | 0.313            | IBIS20-060     |
| 2020                   | Urban   | 7                           | 2          | 62                    | 0.049            | IBIS20-066     |
| 2020                   | Urban   | 7                           | 11         | 1                     | 0.300            | IBIS20-065     |
| 2020                   | Urban   | 7                           | 17         | 89                    | 0.366            | IBIS20-070     |
| 2020                   | Urban   | 8                           | 1          | 67                    | 0.079            | IBIS20-053     |
| 2020                   | Urban   | 9                           | 5          | 66                    | 0.131            | IBIS20-057     |
| 2020                   | Urban   | 9                           | 12         | 49                    | 0.303            | IBIS20-067     |
| 2020                   | Urban   | 9                           | 24         | 28                    | 0.568            | IBIS20-083     |
| 2020                   | Urban   | 10                          | 2          | 60                    | 0.097            | IBIS20-063     |
| 2020                   | Urban   | 10                          | 11         | 51                    | 0.425            | IBIS20-073     |
| 2020                   | Urban   | 10                          | 22         | 26                    | 0.619            | IBIS20-086     |
| 2020                   | Urban   | 11                          | 5          | 88                    | 0.469            | IBIS20-064     |
| 2020                   | Urban   | 11                          | 14         | 73                    | 0.623            | IBIS20-074     |
| 2020                   | Urban   | 11                          | 22         | 72                    | 0.680            | IBIS20-084     |
| 2020                   | Urban   | 12                          | 3          | 63                    | 0.056            | IBIS20-054     |
| 2020                   | Urban   | 12                          | 12         | 48                    | 0.269            | IBIS20-071     |
| 2020                   | Urban   | 12                          | 20         | 56                    | 0.503            | IBIS20-085     |
| 2020                   | Urban   | 13                          | 1          | 55                    | 0.093            | IBIS20-055     |
| 2020                   | Urban   | 14                          | 1          | 52                    | 0.078            | IBIS20-081     |
| 2020                   | Urban   | 14                          | 8          | 53                    | 0.356            | IBIS20-093     |
| 2020                   | Urban   | 14                          | 17         | NS                    | NA               | IBIS20-010     |
| 2020                   | Urban   | 14                          | 21         | NS                    | NA               | IBIS20-011     |
| 2020                   | Urban   | 15                          | 4          | 64                    | 0.130            | IBIS20-078     |
| 2020                   | Urban   | 15                          | 12         | 15                    | 0.372            | IBIS20-090     |
| 2020                   | Urban   | 15                          | 18         | NS                    | NA               | IBIS20-006     |
| 2020                   | Urban   | 16                          | 7          | 50                    | 0.091            | IBIS20-075     |
| 2020                   | Urban   | 16                          | 15         | 7                     | 0.705            | IBIS20-087     |
| 2020                   | Urban   | 16                          | 21         | NS                    | NA               | IBIS20-002     |
| 2020                   | Urban   | 17                          | 4          | 74                    | 0.212            | IBIS20-076     |

|      |       |    |    |    |       |            |
|------|-------|----|----|----|-------|------------|
| 2020 | Urban | 17 | 12 | 75 | 0.403 | IBIS20-088 |
| 2020 | Urban | 17 | 18 | NS | NA    | IBIS20-003 |
| 2020 | Urban | 17 | 25 | NS | NA    | IBIS20-004 |
| 2020 | Urban | 18 | 4  | 47 | 0.049 | IBIS20-077 |
| 2020 | Urban | 18 | 12 | 54 | 0.122 | IBIS20-089 |
| 2020 | Urban | 18 | 18 | NS | NA    | IBIS20-005 |
| 2020 | Urban | 19 | 3  | 84 | 0.175 | IBIS20-079 |
| 2020 | Urban | 19 | 11 | 76 | 0.428 | IBIS20-091 |
| 2020 | Urban | 19 | 20 | NS | NA    | IBIS20-007 |
| 2020 | Urban | 19 | 24 | NS | NA    | IBIS20-008 |
| 2020 | Urban | 20 | 4  | 57 | 0.081 | IBIS20-080 |
| 2020 | Urban | 20 | 12 | 3  | 0.268 | IBIS20-092 |
| 2020 | Urban | 20 | 21 | NS | NA    | IBIS20-009 |
| 2020 | Urban | 21 | 1  | 82 | 0.052 | IBIS20-082 |
| 2020 | Urban | 21 | 8  | 6  | 0.261 | IBIS20-094 |
| 2020 | Urban | 21 | 17 | NS | NA    | IBIS20-001 |
| 2020 | Urban | 22 | 11 | NS | NA    | IBIS20-038 |
| 2020 | Urban | 23 | 13 | NS | NA    | IBIS20-039 |
| 2020 | Urban | 24 | 3  | NS | NA    | IBIS20-012 |
| 2020 | Urban | 25 | 3  | NS | NA    | IBIS20-015 |
| 2020 | Urban | 25 | 11 | NS | NA    | IBIS20-014 |
| 2020 | Urban | 26 | 2  | NS | NA    | IBIS20-013 |
| 2020 | Urban | 26 | 12 | NS | NA    | IBIS20-016 |
| 2020 | Urban | 27 | 2  | NS | NA    | IBIS20-036 |
| 2020 | Urban | 27 | 14 | NS | NA    | IBIS20-037 |
| 2020 | Urban | 28 | 5  | NS | NA    | IBIS20-017 |
| 2020 | Urban | 28 | 10 | NS | NA    | IBIS20-018 |
| 2020 | Urban | 28 | 17 | NS | NA    | IBIS20-019 |
| 2020 | Urban | 29 | 2  | NS | NA    | IBIS20-029 |
| 2020 | Urban | 29 | 11 | NS | NA    | IBIS20-030 |
| 2020 | Urban | 29 | 18 | NS | NA    | IBIS20-031 |
| 2020 | Urban | 30 | 2  | NS | NA    | IBIS20-020 |
| 2020 | Urban | 30 | 7  | NS | NA    | IBIS20-021 |
| 2020 | Urban | 30 | 14 | NS | NA    | IBIS20-022 |
| 2020 | Urban | 30 | 21 | NS | NA    | IBIS20-023 |
| 2020 | Urban | 31 | 3  | NS | NA    | IBIS20-024 |
| 2020 | Urban | 31 | 8  | NS | NA    | IBIS20-025 |
| 2020 | Urban | 32 | 2  | NS | NA    | IBIS20-026 |
| 2020 | Urban | 32 | 7  | NS | NA    | IBIS20-027 |
| 2020 | Urban | 32 | 14 | NS | NA    | IBIS20-028 |
| 2020 | Urban | 33 | 1  | NS | NA    | IBIS20-044 |
| 2020 | Urban | 33 | 6  | NS | NA    | IBIS20-045 |
| 2020 | Urban | 33 | 13 | NS | NA    | IBIS20-046 |
| 2020 | Urban | 34 | 2  | NS | NA    | IBIS20-032 |
| 2020 | Urban | 34 | 7  | NS | NA    | IBIS20-033 |
| 2020 | Urban | 34 | 14 | NS | NA    | IBIS20-034 |
| 2020 | Urban | 34 | 21 | 30 | 0.102 | IBIS20-035 |

|      |       |     |    |     |       |            |
|------|-------|-----|----|-----|-------|------------|
| 2020 | Urban | 35  | 8  | NS  | NA    | IBIS20-042 |
| 2020 | Urban | 35  | 15 | NS  | NA    | IBIS20-043 |
| 2020 | Urban | 36  | 2  | NS  | NA    | IBIS20-040 |
| 2020 | Urban | 36  | 9  | NS  | NA    | IBIS20-041 |
| 2021 | Urban | 101 | 1  | 23  | 0.249 | NS         |
| 2021 | Urban | 101 | 8  | 94  | 0.721 | 60         |
| 2021 | Urban | 101 | 16 | 133 | 0.952 | 63         |
| 2021 | Urban | 101 | 23 | 165 | 1.003 | 126        |
| 2021 | Urban | 102 | 3  | 21  | 0.146 | 13         |
| 2021 | Urban | 102 | 12 | 121 | 0.609 | 80         |
| 2021 | Urban | 102 | 21 | 152 | 0.794 | 102        |
| 2021 | Urban | 103 | 2  | 22  | 0.136 | 12         |
| 2021 | Urban | 103 | 9  | 99  | 0.437 | 47         |
| 2021 | Urban | 103 | 21 | 182 | 0.766 | 105        |
| 2021 | Urban | 104 | 2  | 93  | 0.327 | 61         |
| 2021 | Urban | 104 | 8  | 114 | 0.681 | 78         |
| 2021 | Urban | 104 | 14 | 105 | 0.771 | 77         |
| 2021 | Urban | 104 | 22 | 235 | 0.803 | 131        |
| 2021 | Urban | 105 | 2  | 95  | 0.281 | 59         |
| 2021 | Urban | 105 | 10 | 128 | 0.558 | 70         |
| 2021 | Urban | 105 | 17 | 181 | 0.770 | 106        |
| 2021 | Urban | 105 | 24 | NS  | NA    | 153        |
| 2021 | Urban | 106 | 1  | 97  | 0.436 | 52         |
| 2021 | Urban | 106 | 11 | 150 | 0.839 | 100        |
| 2021 | Urban | 107 | 2  | 103 | 0.378 | 48         |
| 2021 | Urban | 107 | 12 | 151 | 0.722 | 122        |
| 2021 | Urban | 107 | 18 | 205 | 0.776 | 140        |
| 2021 | Urban | 108 | 2  | 96  | 0.420 | 49         |
| 2021 | Urban | 109 | 2  | 100 | 0.277 | 53         |
| 2021 | Urban | 109 | 12 | 153 | 0.643 | 121        |
| 2021 | Urban | 109 | 18 | 204 | 0.654 | 141        |
| 2021 | Urban | 110 | 3  | 98  | 0.241 | 50         |
| 2021 | Urban | 111 | 1  | 101 | 0.265 | 51         |
| 2021 | Urban | 112 | 1  | 117 | 0.401 | 71         |
| 2021 | Urban | 112 | 7  | 106 | 0.487 | 72         |
| 2021 | Urban | 112 | 15 | 233 | 0.656 | 132        |
| 2021 | Urban | 112 | 23 | 261 | 0.864 | 171        |
| 2021 | Urban | 113 | 1  | 115 | 0.481 | 74         |
| 2021 | Urban | 113 | 9  | 148 | 0.487 | 96         |
| 2021 | Urban | 113 | 18 | 247 | 0.658 | NS         |
| 2021 | Urban | 114 | 2  | 116 | 0.493 | 69         |
| 2021 | Urban | 115 | 1  | 119 | 0.381 | 84         |
| 2021 | Urban | 115 | 7  | 189 | 0.606 | 119        |
| 2021 | Urban | 115 | 13 | 177 | 0.854 | 115        |
| 2021 | Urban | 115 | 20 | 222 | 0.831 | 160        |
| 2021 | Urban | 116 | 4  | 124 | 0.788 | 82         |
| 2021 | Urban | 116 | 10 | 190 | 0.693 | 120        |

|      |       |     |    |     |       |     |
|------|-------|-----|----|-----|-------|-----|
| 2021 | Urban | 116 | 16 | 172 | 0.824 | 111 |
| 2021 | Urban | 117 | 1  | 125 | 0.393 | 85  |
| 2021 | Urban | 117 | 7  | 191 | 0.351 | 118 |
| 2021 | Urban | 117 | 13 | 175 | 0.473 | 110 |
| 2021 | Urban | 117 | 20 | 226 | 0.568 | 164 |
| 2021 | Urban | 118 | 1  | 123 | 0.415 | 81  |
| 2021 | Urban | 118 | 10 | 160 | 0.447 | 125 |
| 2021 | Urban | 118 | 15 | 202 | 0.524 | 142 |
| 2021 | Urban | 118 | 21 | 255 | 0.713 | 166 |
| 2021 | Urban | 119 | 1  | 120 | 0.467 | 86  |
| 2021 | Urban | 119 | 11 | 163 | 0.567 | 104 |
| 2021 | Urban | 119 | 17 | 213 | 0.656 | 150 |
| 2021 | Urban | 120 | 4  | 118 | 0.460 | 83  |
| 2021 | Urban | 120 | 13 | 183 | 0.384 | 123 |
| 2021 | Urban | 120 | 18 | 238 | 0.416 | 138 |
| 2021 | Urban | 121 | 4  | 131 | 0.565 | 64  |
| 2021 | Urban | 122 | 3  | 129 | 0.614 | 62  |
| 2021 | Urban | 122 | 10 | 157 | 0.745 | 128 |
| 2021 | Urban | 122 | 16 | 214 | 0.761 | 151 |
| 2021 | Urban | 123 | 3  | 130 | 0.625 | 65  |
| 2021 | Urban | 123 | 10 | 162 | 0.726 | 130 |
| 2021 | Urban | 123 | 16 | NS  | NA    | 148 |
| 2021 | Urban | 123 | 25 | 279 | 0.925 | 178 |
| 2021 | Urban | 124 | 3  | 109 | 0.425 | 66  |
| 2021 | Urban | 124 | 11 | 201 | 0.519 | 136 |
| 2021 | Urban | 125 | 4  | 104 | 0.974 | 67  |
| 2021 | Urban | 126 | 5  | 113 | 0.313 | 79  |
| 2021 | Urban | 126 | 13 | 232 | 0.340 | 133 |
| 2021 | Urban | 127 | 3  | 108 | 0.403 | 68  |
| 2021 | Urban | 127 | 11 | 196 | 0.448 | 137 |
| 2021 | Urban | 127 | 19 | 264 | 0.445 | 170 |
| 2021 | Urban | 128 | 3  | 112 | 0.345 | 76  |
| 2021 | Urban | 128 | 11 | 199 | 0.563 | 135 |
| 2021 | Urban | 128 | 19 | 260 | 0.615 | 168 |
| 2021 | Urban | 129 | 4  | 107 | 0.356 | 75  |
| 2021 | Urban | 129 | 12 | 198 | 0.512 | 134 |
| 2021 | Urban | 129 | 20 | 262 | 0.741 | 169 |
| 2021 | Urban | 130 | 4  | 144 | 0.364 | 93  |
| 2021 | Urban | 130 | 10 | 179 | 0.462 | 114 |
| 2021 | Urban | 130 | 17 | 223 | 0.429 | 161 |
| 2021 | Urban | 131 | 2  | 188 | 0.350 | 117 |
| 2021 | Urban | 131 | 8  | 176 | 0.715 | 112 |
| 2021 | Urban | 131 | 15 | 230 | 0.603 | 163 |
| 2021 | Urban | 132 | 4  | 192 | 0.407 | 94  |
| 2021 | Urban | 132 | 7  | 156 | 0.331 | NS  |
| 2021 | Urban | 132 | 10 | 173 | 0.399 | 116 |
| 2021 | Urban | 132 | 17 | 224 | 0.485 | 162 |

|      |         |      |    |     |       |     |
|------|---------|------|----|-----|-------|-----|
| 2021 | Urban   | 133  | 3  | 146 | 0.329 | 97  |
| 2021 | Urban   | 133  | 11 | 209 | 0.254 | 146 |
| 2021 | Urban   | 133  | 19 | 267 | 0.371 | 176 |
| 2021 | Urban   | 134  | 7  | 147 | 0.323 | 98  |
| 2021 | Urban   | 134  | 15 | 207 | 0.594 | 147 |
| 2021 | Urban   | 134  | 23 | 268 | 1.009 | 173 |
| 2021 | Urban   | 135  | 2  | 185 | 0.263 | 99  |
| 2021 | Urban   | 135  | 10 | 244 | 0.476 | 143 |
| 2021 | Urban   | 135  | 18 | 273 | 0.760 | 174 |
| 2021 | Urban   | 136  | 2  | 149 | 0.476 | 95  |
| 2021 | Urban   | 136  | 10 | 206 | 0.498 | 144 |
| 2021 | Urban   | 136  | 18 | 270 | 0.519 | 172 |
| 2021 | Urban   | 136B | 9  | 237 | 0.237 | NS  |
| 2021 | Urban   | 136B | 11 | 208 | 0.287 | 145 |
| 2021 | Urban   | 137  | 7  | NS  | NA    | 124 |
| 2021 | Urban   | 137  | 10 | 174 | 0.282 | 113 |
| 2021 | Urban   | 137  | 17 | 227 | 0.288 | 159 |
| 2021 | Urban   | 138  | 6  | 184 | 0.467 | 103 |
| 2021 | Urban   | 138  | 11 | 241 | 0.347 | 139 |
| 2021 | Urban   | 138  | 17 | 258 | 0.625 | 165 |
| 2021 | Urban   | 139  | 6  | 158 | 0.375 | 101 |
| 2021 | Urban   | 139  | 13 | 217 | 0.407 | 149 |
| 2021 | Urban   | 139  | 17 | 256 | 0.558 | 167 |
| 2021 | Urban   | 139  | 22 | 278 | 0.613 | 177 |
| 2021 | Urban   | 140  | 8  | 168 | 0.403 | 129 |
| 2021 | Urban   | 140  | 14 | 210 | 0.472 | 152 |
| 2021 | Urban   | 140  | 21 | 269 | 0.484 | 175 |
| 2021 | Urban   | 141  | 5  | 164 | 0.512 | 127 |
| 2021 | Natural | E1   | 4  | 32  | 0.174 | NS  |
| 2021 | Natural | E1   | 11 | 24  | 0.405 | 27  |
| 2021 | Natural | E2   | 5  | 29  | 0.158 | NS  |
| 2021 | Natural | E2   | 12 | 26  | 0.399 | 26  |
| 2021 | Natural | E2   | 20 | 43  | 0.484 | 22  |
| 2021 | Natural | E3   | 3  | 28  | 0.201 | NS  |
| 2021 | Natural | E4   | 1  | 30  | 0.161 | NS  |
| 2021 | Natural | E5   | 4  | 35  | 0.124 | NS  |
| 2021 | Natural | E5   | 11 | 37  | 0.195 | 24  |
| 2021 | Natural | E5   | 19 | 55  | 0.216 | NS  |
| 2021 | Natural | E7   | 2  | 27  | 0.183 | NS  |
| 2021 | Natural | E7   | 9  | 40  | 0.349 | 25  |
| 2021 | Natural | E7   | 17 | 44  | 0.450 | 20  |
| 2021 | Natural | E8   | 11 | 14  | 0.443 | 28  |
| 2021 | Natural | E8   | 19 | 51  | 0.259 | NS  |
| 2021 | Natural | E9   | 1  | 38  | 0.107 | 32  |
| 2021 | Natural | E9   | 9  | 46  | 0.318 | 14  |
| 2021 | Natural | E9   | 15 | 57  | 0.399 | 27  |
| 2021 | Natural | E10  | 1  | 41  | 0.295 | 31  |

|      |         |     |    |     |       |     |
|------|---------|-----|----|-----|-------|-----|
| 2021 | Natural | E10 | 9  | 42  | 0.400 | 21  |
| 2021 | Natural | E10 | 15 | 69  | 0.543 | 33  |
| 2021 | Natural | E11 | 1  | 36  | 0.170 | 30  |
| 2021 | Natural | E11 | 9  | 45  | 0.283 | 18  |
| 2021 | Natural | E12 | 1  | 33  | 0.146 | 23  |
| 2021 | Natural | E12 | 9  | 47  | 0.387 | 15  |
| 2021 | Natural | E12 | 15 | 68  | 0.512 | 41  |
| 2021 | Natural | E13 | 2  | 25  | 0.171 | 29  |
| 2021 | Natural | E13 | 10 | 50  | 0.420 | 16  |
| 2021 | Natural | E13 | 16 | 58  | 0.444 | 39  |
| 2021 | Natural | E13 | 23 | 6   | 0.976 | 7   |
| 2021 | Natural | E14 | 12 | NS  | NA    | 17  |
| 2021 | Natural | E14 | 18 | 74  | 1.047 | 43  |
| 2021 | Natural | E15 | 17 | NS  | NA    | 19  |
| 2021 | Natural | E15 | 23 | 60  | 0.529 | 38  |
| 2021 | Natural | E16 | 10 | 59  | 0.646 | 35  |
| 2021 | Natural | E17 | 10 | 66  | 0.408 | 42  |
| 2021 | Natural | E18 | 11 | 72  | 0.501 | 34  |
| 2021 | Natural | E19 | 10 | 61  | 0.379 | 36  |
| 2021 | Natural | E20 | 15 | 67  | 0.467 | 40  |
| 2021 | Natural | E20 | 22 | 1   | 0.744 | 6   |
| 2021 | Natural | E21 | 10 | 8   | 0.429 | 8   |
| 2021 | Natural | E22 | 10 | 2   | 0.836 | 3   |
| 2021 | Natural | E23 | 11 | 9   | 0.259 | 1   |
| 2021 | Natural | E24 | 10 | 10  | 0.231 | 2   |
| 2021 | Natural | E25 | 11 | 5   | 0.246 | 11  |
| 2021 | Natural | E26 | 11 | NS  | NA    | 4   |
| 2021 | Natural | E27 | 8  | 3   | 0.383 | 5   |
| 2021 | Natural | E28 | 11 | 86  | 0.527 | 58  |
| 2021 | Natural | E28 | 18 | 134 | 0.809 | 90  |
| 2021 | Natural | E29 | 12 | 82  | 0.617 | 44  |
| 2021 | Natural | E29 | 19 | 142 | 0.732 | 87  |
| 2021 | Natural | E30 | 13 | 81  | 0.500 | 57  |
| 2021 | Natural | E31 | 6  | 88  | 0.501 | 46  |
| 2021 | Natural | E31 | 13 | 135 | 0.620 | 91  |
| 2021 | Natural | E31 | 20 | 170 | 0.667 | 108 |
| 2021 | Natural | E32 | 5  | 83  | 0.414 | 54  |
| 2021 | Natural | E32 | 12 | 139 | 0.616 | 92  |
| 2021 | Natural | E32 | 19 | 171 | 0.723 | 109 |
| 2021 | Natural | E33 | 5  | 91  | 0.502 | 55  |
| 2021 | Natural | E33 | 12 | 137 | 0.722 | 89  |
| 2021 | Natural | E33 | 19 | 169 | 0.733 | 107 |
| 2021 | Natural | E34 | 6  | 87  | 0.416 | 45  |
| 2021 | Natural | E34 | 13 | 136 | 0.750 | 88  |
| 2021 | Natural | E35 | 3  | 84  | 0.292 | 56  |
| 2021 | Natural | E36 | 18 | 253 | 0.696 | 157 |
| 2021 | Natural | E37 | 19 | 249 | 0.680 | 155 |

|      |         |     |    |     |       |     |
|------|---------|-----|----|-----|-------|-----|
| 2021 | Natural | E38 | 18 | 220 | 0.798 | 158 |
| 2021 | Natural | E39 | 19 | 221 | 0.965 | 156 |
| 2021 | Natural | E40 | 16 | 219 | 0.624 | 154 |

Ibis Field ID<sup>++</sup> = the same bird, sampled over time, is indicated by the same Ibis Field ID number, within a given hal

S/N\* = sample-to-negative ratio in bELISA: S/n values  $\leq 0.7$  are considered positive for antibodies to AIV

Ct<sup>#</sup> = cycle threshold; samples with Ct  $\leq 45$  considered positive for AIV viral RNA

NS<sup>A</sup> = NO SAMPLE: a sample of this type was not collected for a given bird or time-point

NA<sup>B</sup> = NOT APPLICABLE: a test of the indicated type was not performed because no sample was collected

N/D<sup>C</sup> = NOT DETECTED (rrt-PCR): IAV viral RNA was not detected in rrt-PCR with a cycle threshold  $\leq 45$

N/D<sup>D</sup> = NOT DETECTED (virus isolation): IAV was not isolated from the sample when inoculated into embryonated

## Biological Screening

[illegible]



[illegible]



[illegible]

|     |     |
|-----|-----|
| N/D | N/D |
| NA  | NA  |
| N/D | N/D |
| NA  | NA  |
| N/D | N/D |
| NA  | NA  |
| N/D | N/D |
| N/D | N/D |
| NA  | NA  |
| NA  | NA  |
| NA  | NA  |
| N/D | N/D |
| NA  | NA  |
| NA  | NA  |
| N/D | N/D |
| N/D | N/D |
| N/D | N/D |
| NA  | NA  |
| N/D | N/D |
| N/D | N/D |
| N/D | N/D |
| NA  | NA  |
| N/D | N/D |



|     |     |
|-----|-----|
| N/D | N/D |
| N/D | N/D |
| N/D | N/D |

bitat and within a given collection year.

| chicken eggs
